# Supplementary material for: The Scoop on SCOBY (Symbiotic Culture of Bacteria and Yeast): Exploring Consumer Behaviours towards a Novel Ice Cream
Source: MDPI journal article supplement (doi:10.3390/foods12173152), 2023-08-22
Supplement: s1 [file s1]

**Table S1.** Questionnaire design of the study

| Sections                                   | Statements                                                                                                                                                                                                                                                                                                                                                                                                                                                                                                                                                                                                                                                                                                                                                                                                                   |
|--------------------------------------------|------------------------------------------------------------------------------------------------------------------------------------------------------------------------------------------------------------------------------------------------------------------------------------------------------------------------------------------------------------------------------------------------------------------------------------------------------------------------------------------------------------------------------------------------------------------------------------------------------------------------------------------------------------------------------------------------------------------------------------------------------------------------------------------------------------------------------|
| 1. SCOBY information                       | <p>SCOBY is a thick, rubbery and cloudy mat made by a symbiotic relationship between acetic acid bacteria and the osmophilic yeast species. SCOBY is used to ferment green tea or oolong tea to make Kombucha, which is a rich source of organic acids, water-soluble vitamins, proteins, lipids, hydrolytic enzymes, minerals, polyphenols and metabolic products of yeast and bacteria. SCOBY fermented tea has several health benefits, such as high in probiotics, anti-inflammatory, antioxidant activity, anti-diabetics, anti-carcinogenic, and improved liver, immune system and gastrointestinal functions.</p> <p>SCOBY ice cream is a novel product made with SCOBY due to its various health benefits, such as high probiotic count. Considering its health benefits, please answer the following questions.</p> |
| 2. Primary constructs and their predictors |                                                                                                                                                                                                                                                                                                                                                                                                                                                                                                                                                                                                                                                                                                                                                                                                                              |
| Attitude                                   | <p>Consuming SCOBY ice cream in the future will be (not at all pleasant/pleasant)</p> <p>Consuming SCOBY ice cream in the future will be (not at all tasty/tasty)</p> <p>Consuming SCOBY ice cream in the future will be (Not at all relevant/relevant)</p> <p>Consuming SCOBY ice cream in the future will be (not at all important/important)</p>                                                                                                                                                                                                                                                                                                                                                                                                                                                                          |
| Behavioural belief                         | <p>Eating SCOBY ice cream in the future will be healthy.</p> <p>Eating SCOBY ice cream in the future will be safe.</p> <p>SCOBY ice cream will have a pleasant taste.</p> <p>Eating SCOBY ice cream in the future will be expensive.</p>                                                                                                                                                                                                                                                                                                                                                                                                                                                                                                                                                                                     |
| Outcome evaluation                         | <p>How important do you think are the following aspects when you select an ice cream?</p> <p>Health/Safety/Taste/Price</p>                                                                                                                                                                                                                                                                                                                                                                                                                                                                                                                                                                                                                                                                                                   |
| Subjective norm                            | <p>People who are important to me will approve that I should try SCOBY ice cream.</p> <p>People who are important to me will buy SCOBY ice cream.</p> <p>People who are important to me support buying SCOBY ice cream.</p>                                                                                                                                                                                                                                                                                                                                                                                                                                                                                                                                                                                                  |
| Normative beliefs                          | <p>I will eat SCOBY ice cream if my family/friends/nutritionist/advertisement encourages me.</p>                                                                                                                                                                                                                                                                                                                                                                                                                                                                                                                                                                                                                                                                                                                             |
| Motivation to comply                       | <p>How important is the opinion of the following people/institutions for you to decide regarding ice cream?</p> <p>family/friends/nutritionist/advertisement</p>                                                                                                                                                                                                                                                                                                                                                                                                                                                                                                                                                                                                                                                             |
| Perceived behavioural control              | <p>The decision to eat SCOBY ice cream will be entirely under my control.</p> <p>The ability to purchase SCOBY ice cream will be entirely up to me.</p> <p>I am confident in my decision to buy SCOBY ice cream.</p>                                                                                                                                                                                                                                                                                                                                                                                                                                                                                                                                                                                                         |
| Control beliefs                            | <p>Eating SCOBY ice cream will be possible if it is available in the market.</p> <p>Eating SCOBY ice cream will be possible if it is compatible with my food habits.</p>                                                                                                                                                                                                                                                                                                                                                                                                                                                                                                                                                                                                                                                     |
| Power factor                               | <p>Availability in the market makes it easy/difficult for me to try SCOBY ice cream.</p> <p>Compatibility with my food habits makes it easy/difficult for me to try SCOBY ice cream.</p>                                                                                                                                                                                                                                                                                                                                                                                                                                                                                                                                                                                                                                     |
| Intention                                  | <p>For sure I will eat SCOBY ice cream in the future.</p> <p>I intend to eat SCOBY ice cream in the future.</p>                                                                                                                                                                                                                                                                                                                                                                                                                                                                                                                                                                                                                                                                                                              |
| 3. Additional constructs                   |                                                                                                                                                                                                                                                                                                                                                                                                                                                                                                                                                                                                                                                                                                                                                                                                                              |
| Neophobia                                  | <p>I always try new and different products.</p> <p>I am afraid to eat things that I have never eaten before.</p> <p>I will eat almost all types of food.</p>                                                                                                                                                                                                                                                                                                                                                                                                                                                                                                                                                                                                                                                                 |
| Emotions                                   | <p>Information: After eating SCOBY ice cream, I will feel _____. (hopeless/hopeful)</p> <p>Speed: Consuming SCOBY ice cream will make me feel _____. (Discouraged/encouraged)</p> <p>Relevance: The thought of consuming SCOBY ice cream makes me feel _____. (unfulfilled/fulfilled)</p> <p>Commitment: I feel (_____) when I think to try SCOBY ice cream. (guilty/proud)</p>                                                                                                                                                                                                                                                                                                                                                                                                                                              |
| 4. Demographics                            | Age, gender, education and ethnicity                                                                                                                                                                                                                                                                                                                                                                                                                                                                                                                                                                                                                                                                                                                                                                                         |
